# Supplementary material
Source: Springer Nature journal article supplement (https://www.springermedizin.de/resource/supplementary/12936_2012_2780_MOESM18_ESM.pdf/9544528)

$$(S5b - S5a)/(S5b + S5a)$$

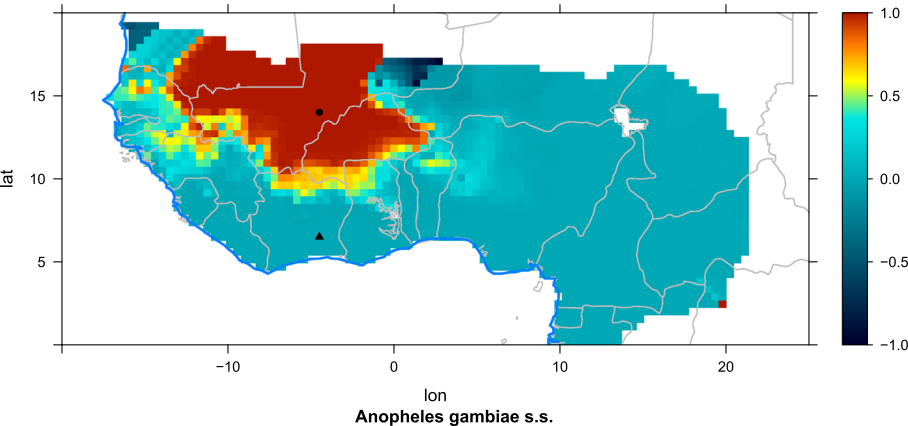

Supplement: MOESM18 [file 9544528]
